# Supplementary material for: IL-13Rα2 humanized scFv-based CAR-T cells exhibit therapeutic activity against glioblastoma
Source: PubMed Central journal article supplement — Mol Ther Oncolytics. 2022 Jan 10;24:443–51. doi: 10.1016/j.omto.2022.01.002 (PMC8810302; doi:10.1016/j.omto.2022.01.002), 2022-01-10
Supplement: mmc1.pdf [file mmc1.pdf]

**OMTO, Volume 24**

**Supplemental information**

**IL-13R $\alpha$ 2 humanized scFv-based CAR-T cells exhibit  
therapeutic activity against glioblastoma**

**Chang Xu, Yue Bai, Zhijing An, Yi Hu, Can Zhang, and Xiaosong Zhong**

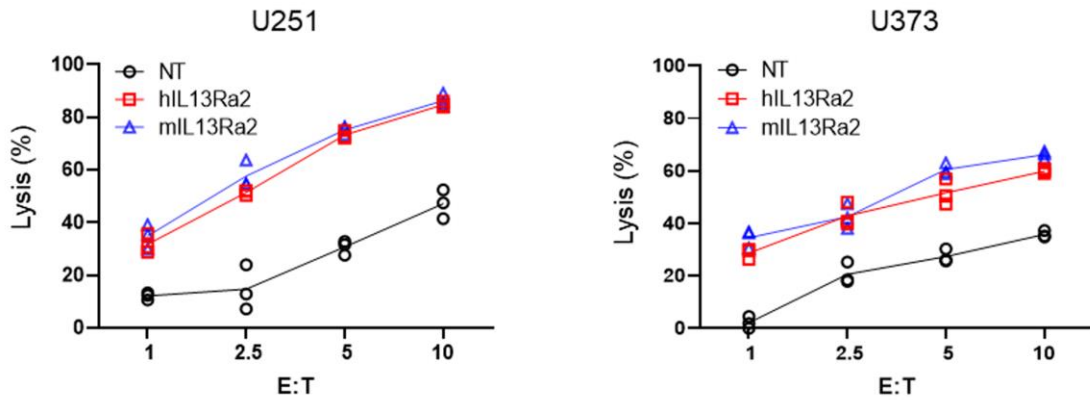

**Fig. S1. In vitro killing assay**

In vitro killing assays were processed at E:T ratio from 1:1 to 10:1 with non-transduced T cells as negative control. The tumor cell lysis was examined by detecting luciferase activity.

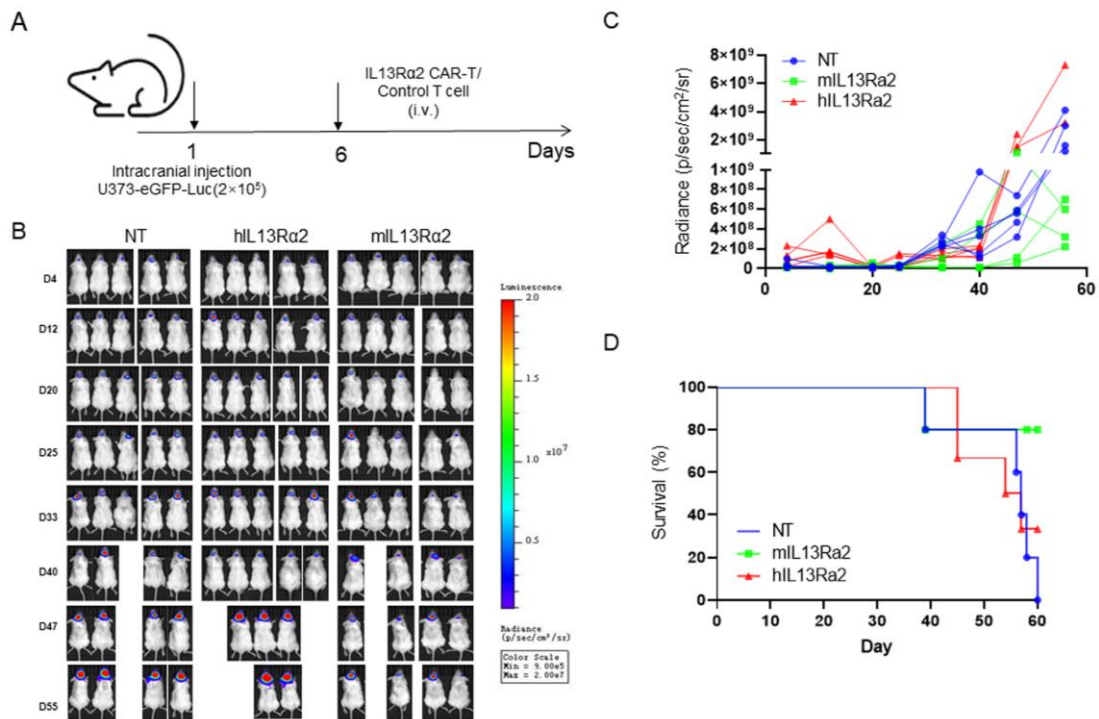

**Fig. S2. T cells expressing humanized CAR targeting IL13Ra2 do not show significant suppression activity in U373 cell generated intracranial mouse model.**

Xenograft mouse model was generated via U373-eGFP-Luc cell intracranial injection. The tumor growth was monitored by IVIS system. The overall survival was measured using the Kaplan–Meier method, with Cox proportional hazard regression analysis for group. comparison. Statistical significance was set at  $p < 0.05$ .
